# Association between 5-HT1A receptor C-1019G, 5-HTTLPR polymorphisms and panic disorder: a meta-analysis

Wenli Zhu<sup>1,\*</sup>, Yangying Bu<sup>1,\*</sup>, Lijuan Wu<sup>2,\*</sup>, Junwei Li<sup>1</sup>, Chuanfu Song<sup>1</sup>, Yihui Hao<sup>3</sup>

<sup>1</sup>Department of Psychiatry, Fourth Hospital of Wuhu City, Wuhu, Anhui, China

<sup>2</sup>Department of Psychiatry, Shenyang Mental Health Center, Shenyang, Liaoning, China

<sup>3</sup>Department of Psychiatry, First Affiliated Hospital of Zhengzhou University, Zhengzhou, Henan, China

\*Equal contribution

**Correspondence to:** Chuanfu Song, Yihui Hao; **email:** [songchfu@163.com](mailto:songchfu@163.com), <https://orcid.org/0009-0009-1756-9870>; [haols6868@163.com](mailto:haols6868@163.com), <https://orcid.org/0009-0009-9062-7037>

**Keywords:** serotonin, 5-HT1a receptor, serotonin plasma membrane transport proteins, genetic polymorphism, panic attack

**Received:** February 19, 2024

**Accepted:** July 2, 2024

**Published:** August 28, 2024

**Copyright:** © 2024 Zhu et al. This is an open access article distributed under the terms of the [Creative Commons Attribution License](https://creativecommons.org/licenses/by/4.0/) (CC BY 4.0), which permits unrestricted use, distribution, and reproduction in any medium, provided the original author and source are credited.

## ABSTRACT

**HTR1A C-1019G polymorphism (rs6295) and serotonin transporter promoter polymorphism (5-HTTLPR) have been linked with panic disorder (PD) in different ethnic backgrounds. Both these polymorphisms are in the promoter regions. However, results are inconsistent and contrasting evidence makes reliable conclusions even more challenging. A meta-analysis was conducted to test whether C-1019G polymorphism and 5-HTTLPR were involved in the etiology of PD. Articles researching the link between C-1019G, 5-HTTLPR polymorphisms, and PD were retrieved by database searching and systematically selected on the basis of selected inclusion parameters. 21 studies were included that examined the relationship of rs6295, 5-HTTLPR polymorphisms with PD risk susceptibility (rs6295 polymorphism – 7 articles, and 5-HTTLPR polymorphism - 14 articles). A significant association was seen between the rs6295 polymorphism and PD pathogenesis, especially in Caucasian PD patients. No significant genetic linkage was found between the 5-HTTLPR polymorphism and PD. C-1019G polymorphism was involved in the etiology of PD in Caucasian patients. The 5-HTTLPR polymorphism was not a susceptibility factor of PD.**

## INTRODUCTION

Panic disorder (PD) is an anxiety disorder that is characterized by unpredicted and recurrent panic attacks [1]. PD affects up to 4% of the general populace [2]. Previous studies have shown that genetic factors have a critical function in the pathobiology of PD since genetic causes are responsible for 43% of the variations observed in PD [3].

The selective serotonin-reuptake inhibitors (SSRIs) are the primary antidepressants for the treatment of PD [4–6]. Their mechanism of action is to inhibit 5-HT uptakes in the presynaptic cleft, thereby raising the level of available 5-HT in the synaptic cleft. Thus, polymorphisms in the genes that modulate serotonin

level and affect 5-HT neurotransmission signal transduction, such as serotonin transporter (5-HTT) and 5-HT1A receptor (5-HTR1A) may be involved in the etiopathogenesis of PD.

On comparing positron emission tomography (PET) results with control subjects, patients suffering from PD had significantly lower 5-HT1A radioligand binding in select areas of the brain [7]. Further, 5-HT1A receptor gene was also found to be implicated in PD [8, 9]. *In vivo* studies showed that mice with 5-HT1A receptor gene knockout displayed higher anxiety-like symptoms relative to wild-type mice [10]. Therefore, the 5-HT1A receptor gene can be potentially involved in PD [11]. C-1019G single nucleotide polymorphism (SNP rs6295) is situated in the HTR1A promoter, and has been linked

with several psychiatric diseases and differences in treatment response to antidepressants [12–14].

The human serotonergic transporter gene (5-HTT) maps on chromosome 17q11.1-q12 [15] and modulates serotonin reabsorption from the synaptic cleft, thereby terminating the serotonergic system. Among the different 5-HTT gene single nucleotide polymorphisms, there is a single nucleotide polymorphism (44 bp insertion/deletion) in the 5-HTT promoter region – that result in two alleles (L-long and S-short) – has been extensively studied. The transcriptional activity associated with the L allele is significantly more efficient compared with that of the S allele [15, 16]. Therefore, the L allele displays higher serotonin reuptake and lower level of serotonin in the synaptic cleft, which increases the risk of the development of psychiatric disorders such as depression, anorexia nervosa, suicide ideation, and PD [17–20].

Previous case-control studies have explored the genetic association of 5-HT1A receptor C-1019G, 5-HTTLPR, and PD, but the results were contradictory and inconclusive mainly due to different ethnic-dependent backgrounds, false-positive results, and insufficient sample sizes. To overcome the limitations of previous studies, a meta-analysis was performed to identify the HTR1A and 5-HTT genetic SNPs in PD. We combined the results of different studies, studies with small sample sizes, and/or conflicting results, thereby increasing their statistical power than that of the individual studies.

## RESULTS

There was a total of 530 articles about 5-HT1A with PD in the database. After screening, 7 articles, including 967 Panic Attack Cases Groups and 999 healthy control Groups [8, 9, 21–25] were included in the meta-analysis (Table 1 and Supplementary Table 1).

A total of 335 articles about 5-HTTLPR with PD were retrieved, excluding 107 duplicated articles, studies with missing data, animal studies, literature reviews, meeting abstracts, etc. After screening, 14 studies were selected (Table 2 and Supplementary Table 2). Among them, Deckert et al. [26] mentioned the case-control study data of the German population and the case-control study data of the Italian population. The data were included as two samples, and the total sample number was as follows:  $N = 15$ , [22, 24–36], see Figure 1 for the detailed retrieval process.

The data analysis results are shown in Figure 2. We analyzed the 7 articles about 5-HT1A with PD and constructed data models with G as the risk factor. A total of 5 data models were established (GG vs. CC,

Figure 2, GG versus CC +GC, Figure 3, GC vs. CC, Figure 4, GG+GC vs. CC, Figure 5, G vs. C, Figure 6), no significant heterogeneity was found in all data models, and the fixed-effect model was employed for analyzing the results. The results of GG vs. CC analysis were  $OR = 1.59$ ,  $95\%CI = (1.16-2.19)$ ,  $Z = 2.85$ ,  $P = 0.004$ , Figure 2, GG versus CC+GC,  $OR = 1.24$ ,  $95\%CI = (1.00-1.55)$   $z = 1.97$ ,  $P = 0.049$ , Figure 3. The results were statistically significant, and no positive results were found in other models. The results could be considered G allele as a risk factor for PD. Group analysis was conducted to address the differences between Asian and Caucasian races. The analysis results showed that  $OR = 2.00$ ,  $95\%CI = (1.31-3.06)$ ,  $z = 3.22$ ,  $P = 0.001$ , Figure 2. Caucasian GG versus CC+GC,  $OR = 1.71$ ,  $95\%CI = (1.21-2.42)$   $z = 3.02$ ,  $p = 0.003$ , Figure 3. Caucasian G versus C,  $z = 2.21$ ,  $P = 0.03$ ,  $OR = 1.59$ ,  $95\%CI = (1.16-2.19)$ , Figure 3. Caucasian G Versus C in the grouping analysis was statistically significant, while G Versus C in the overall data was not statistically significant, suggesting that there was a significant difference between Asian and Caucasian genotypes. The results suggest that 5-HT1A (rs6295) gene polymorphism is linked with PD in Caucasian patients, and the G allele is a risk factor for PD in the Caucasian population.

Previous case-control studies showed that there was no significant difference in 5-HTTLPR gene polymorphism between patients with PD and normal subjects. To further investigate whether there was a correlation, we hypothesized that the L allele may be a susceptibility factor for PD and established a model for meta-analysis. A total of models (L/L vs. S/S, Figure 1, L/L vs. L/S, Figure 2, L/S vs. S/S, Figure 3, L vs. S, Figure 4, LL+LS vs. SS, Figure 5, LL vs. LS+SS, Figure 6) were established to test the heterogeneity of the models. In general, the heterogeneity of the model ranged from 0.00% to 34.9%, so the heterogeneity was considered small or absent, and the fixed-effect model was analyzed. No significant results were found in the analysis of all the models: L/L versus S/S:  $OR = 1.16$ ,  $95\%CI = (0.93-1.44)$ ,  $Z = 1.29$   $P = 0.20$ , Figure 7; L/L versus L/S:  $OR = 1.13$ ,  $95\%CI = (0.95-1.34)$ ,  $Z = 1.33$ ,  $P = 0.19$ , Figure 8; L/S versus S/S,  $OR = 0.92$ ,  $95\%CI = (0.80-1.06)$ ,  $Z = 1.20$ ,  $P = 0.23$ , Figure 9; L versus S:  $OR = 0.98$ ,  $95\%CI = (0.90-1.08)$ ,  $Z = 0.37$ ,  $P = 0.71$ , Figure 10; LL+LS versus SS:  $OR = 0.95$ ,  $95\%CI = (0.84-1.08)$ ,  $Z = 0.76$ ,  $P = 0.447$ , Figure 11; LL versus LS+SS:  $OR = 1.11$ ,  $95\%CI = (0.94-1.31)$ ,  $Z = 1.28$ ,  $P = 0.200$ , Figure 12.

To address the differences in the results among different races, we conducted grouping analysis. The grouping criteria were the races explicitly mentioned in the study,

**Table 1. Summary of studies examining the relationship between the 5-HT1A C-1019G polymorphism and PD.**

| References             | Race      | Results                 | Genotype |    |     |             |    |     | Allele   |     |             |     |
|------------------------|-----------|-------------------------|----------|----|-----|-------------|----|-----|----------|-----|-------------|-----|
|                        |           |                         | Case (n) |    |     | Control (n) |    |     | Case (n) |     | Control (n) |     |
|                        |           |                         | GG       | GC | CC  | GG          | GC | CC  | G        | C   | G           | C   |
| Huang et al. (2004)    | Caucasian | No association          | 24       | 43 | 20  | 23          | 50 | 34  | 91       | 83  | 96          | 118 |
| Rothe et al. (2004)    | German    | G is associated with PD | 42       | 59 | 32  | 27          | 70 | 37  | 143      | 123 | 144         | 124 |
| Carolina et al. (2010) | German    | G is associated with PD | 33       | 53 | 21  | 24          | 62 | 39  | 119      | 95  | 110         | 140 |
| Choi et al. (2010)     | Korean    | No association          | 44       | 43 | 7   | 58          | 46 | 7   | 131      | 57  | 162         | 60  |
| Choe et al. (2012)     | Korean    | No association          | 12       | 71 | 111 | 8           | 62 | 102 | 95       | 293 | 78          | 266 |
| Takashi et al. (2017)  | Japan     | G is associated with PD | 10       | 54 | 55  | 5           | 55 | 59  | 74       | 164 | 65          | 173 |
| Zou et al. (2020)      | Han       | No association          | 138      | 83 | 12  | 138         | 82 | 11  | 359      | 107 | 358         | 104 |

**Table 2. The genotype frequency of 5-HTTLPR polymorphism and PD included studies.**

| Author      | Year | Race         | Main results   | Case  |     |     |     | control |     |     |     | case |     | Control |     |
|-------------|------|--------------|----------------|-------|-----|-----|-----|---------|-----|-----|-----|------|-----|---------|-----|
|             |      |              |                | Total | L/L | L/S | S/S | Total   | L/L | L/S | S/S | L    | S   | L       | S   |
| Deckert     | 1997 | Germany      | No association | 85    | 29  | 44  | 12  | 90      | 32  | 42  | 16  | 102  | 68  | 106     | 74  |
| Deckert     | 1997 | Italian      | No association | 73    | 28  | 32  | 13  | 79      | 23  | 44  | 12  | 88   | 58  | 90      | 68  |
| Ishiguro    | 1997 | Japan        | No association | 66    | 2   | 13  | 51  | 150     | 4   | 32  | 114 | 17   | 113 | 40      | 260 |
| Matsushita  | 1997 | Japan        | No association | 86    | 7   | 35  | 44  | 213     | 10  | 78  | 125 | 49   | 123 | 98      | 328 |
| Ohara       | 1999 | Japan        | No association | 27    | 1   | 4   | 22  | 106     | 3   | 24  | 79  | 6    | 48  | 30      | 182 |
| Samochowiec | 2004 | Poland       | No association | 95    | 45  | 40  | 10  | 202     | 85  | 97  | 20  | 130  | 60  | 264     | 140 |
| Barrondo    | 2005 | No mentioned | No association | 92    | 32  | 42  | 18  | 174     | 64  | 74  | 36  | 87   | 97  | 202     | 146 |
| Maron       | 2005 | Estonia      | No association | 158   | 75  | 72  | 11  | 215     | 80  | 101 | 34  | 222  | 94  | 261     | 169 |
| Olesen      | 2005 | Denmark      | No association | 104   | 36  | 50  | 18  | 108     | 38  | 52  | 18  | 122  | 86  | 127     | 89  |
| Kim         | 2006 | Korea        | No association | 244   | 8   | 77  | 159 | 227     | 10  | 76  | 141 | 93   | 395 | 96      | 358 |
| Choe        | 2013 | Korea        | No association | 191   | 11  | 71  | 109 | 166     | 6   | 63  | 97  | 93   | 289 | 75      | 257 |
| Watanabe    | 2017 | Japan        | No association | 119   | 4   | 42  | 73  | 119     | 7   | 41  | 71  | 50   | 188 | 55      | 183 |
| Schiele     | 2019 | Caucasian    | No association | 109   | 36  | 59  | 14  | 536     | 207 | 263 | 66  | 131  | 87  | 692     | 395 |
| Zou         | 2020 | China        | No association | 233   | 22  | 63  | 148 | 231     | 20  | 90  | 121 | 107  | 359 | 130     | 332 |
| Tanahashi   | 2021 | Japan        | No association | 515   | 29  | 148 | 338 | 440     | 18  | 144 | 278 | 206  | 824 | 180     | 700 |

which were divided into Caucasian and Asian race. Barrondo et al. [32] did not include information about the races. After grouping, the same model was used for grouping analysis, and the heterogeneity test was conducted on the basis of grouping, with the results ranging from 0.00% to 32.3%. The same test results showed no or small heterogeneity. The fixed effect model was used for further analysis. L/L versus S/S, OR = 1.24, 95% CI = (0.90- 1.72), Z = 1.32, P = 0.19; L/L versus L/S: OR = 1.09, 95% CI = (0.87-1.35), Z = 0.75, P = 0.46; L/S versus S/S, OR = 1.14, 95% CI = (0.84-1.56), Z = 0.83, P = 0.404; L versus S: OR = 1.11, 95% CI = (0.96 1.28), Z = 1.36, P = 0.173; LL+LS versus SS: OR = 1.17, 95%CI = (0.88-1.60), Z=1.12, P=0.27; LL versus LS+SS: OR = 1.12, 95%CI = (0.91-1.38), Z = 1.09, P = 0.278. Test results showed no significant correlation. L/L versus S/S: OR = 1.10, 95%CI = (0.80-1.53), Z = 0.59 P = 0.552; L/L versus L/S: OR = 1.34, 95%CI = (0.95-1.88), Z = 1.68, P = 0.09; L/S versus S/S, OR = 0.86, 95% CI = (0.74- 1.00), Z = 1.87, P = 0.06; L versus S: OR = 0.95, 95% CI = (0.84- 1.07), Z =

0.84, P = 0.40; LL+LS versus SS: OR=0.89, 95%CI = (0.77-1.04), Z = 1.49, P = 0.14; LL versus LS+SS: OR = 1.18, 95%CI = (0.85-1.63), Z = 1.00, P = 0.316. The test results showed no correlation. The frequency of 5-HTTLPR gene or allele is not correlated with PD.

**Sensitivity analysis**

Sensitivity analysis of 5-HTIA showed that the Estimate value was 1.19 and the 95% CI was (1.10-1.30); sensitivity analysis did not affect the analysis results. Sensitivity analysis of 5-HTTLPR was that the Estimate value was 0.99 and the 95% CI was (0.94-1.05); and the results showed that the sensitivity analysis results did not affect the final analysis results.

**Publication bias**

We employed the Begg’s to detect publication bias on 5-HTIA analysis results. The results showed no bias (z=1.16, P=0.24). We used Begg’s test to detect the

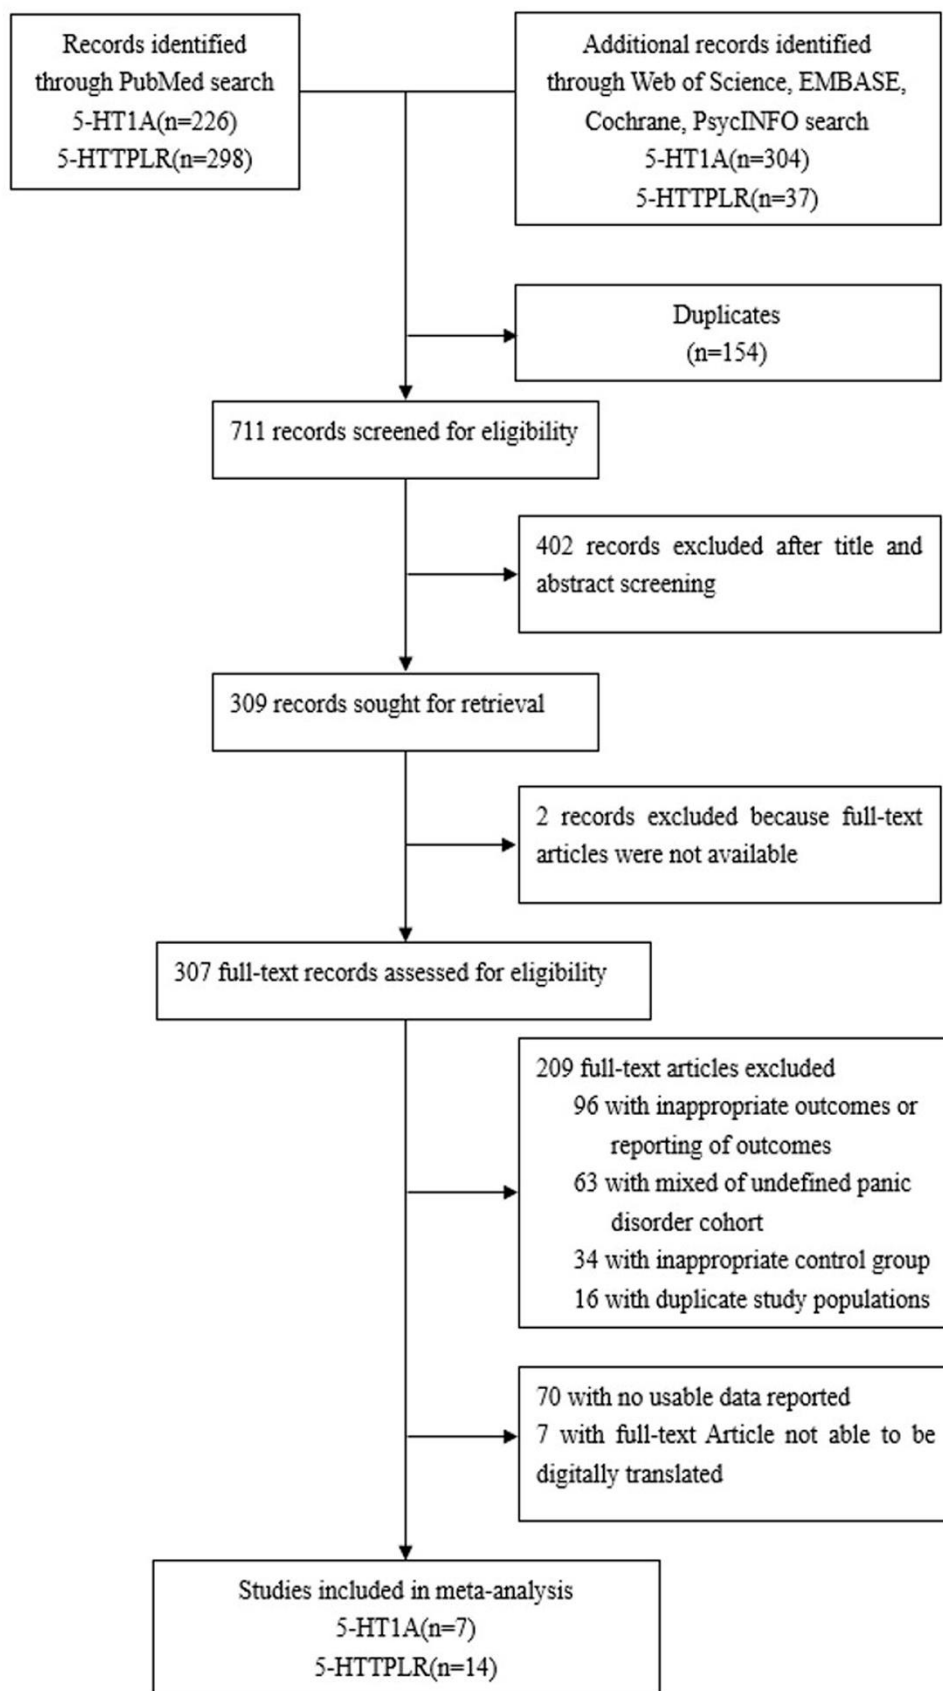

Figure 1. The detailed retrieval processes.

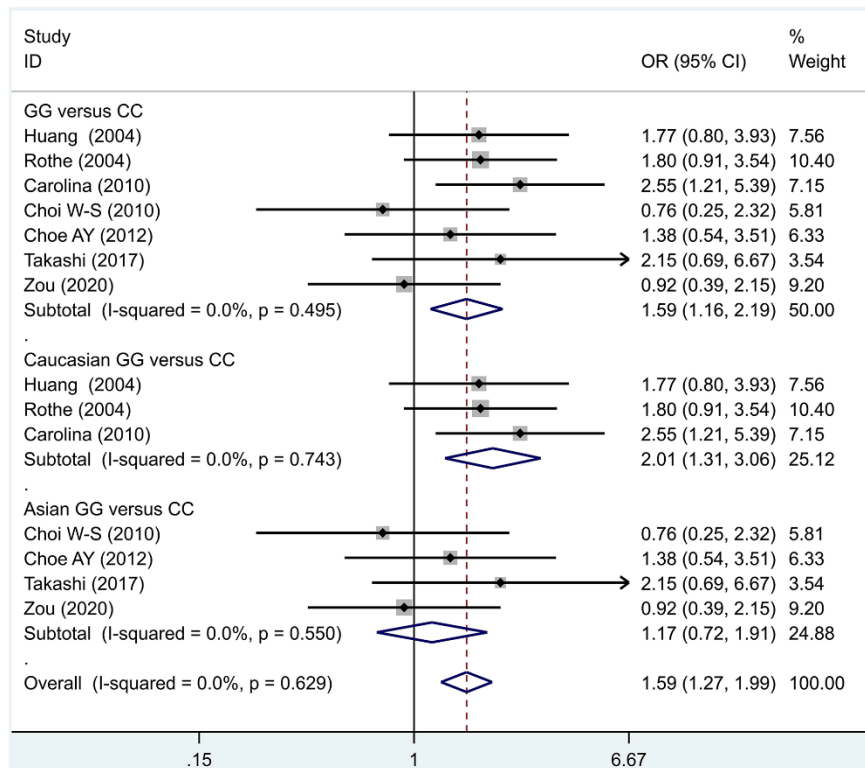

Figure 2. Results of the fixed-effects meta-analysis for the 5-HT1A genotype (GG versus CC) in the PD and control groups.

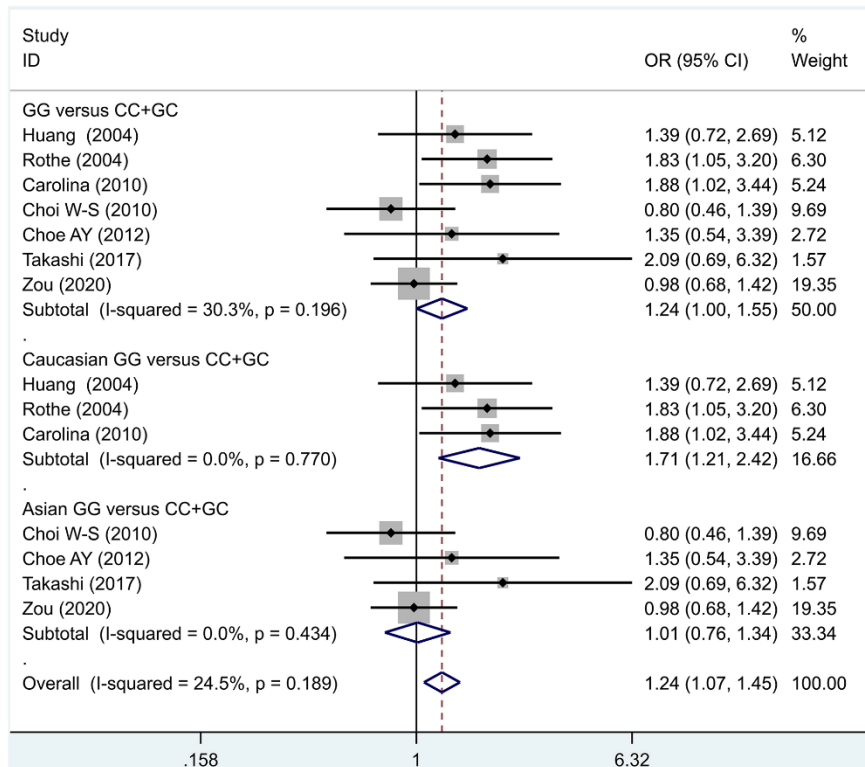

Figure 3. Results of the fixed-effects meta-analysis for the 5-HT1A genotype (GG versus CC +GC) in the PD and control groups.

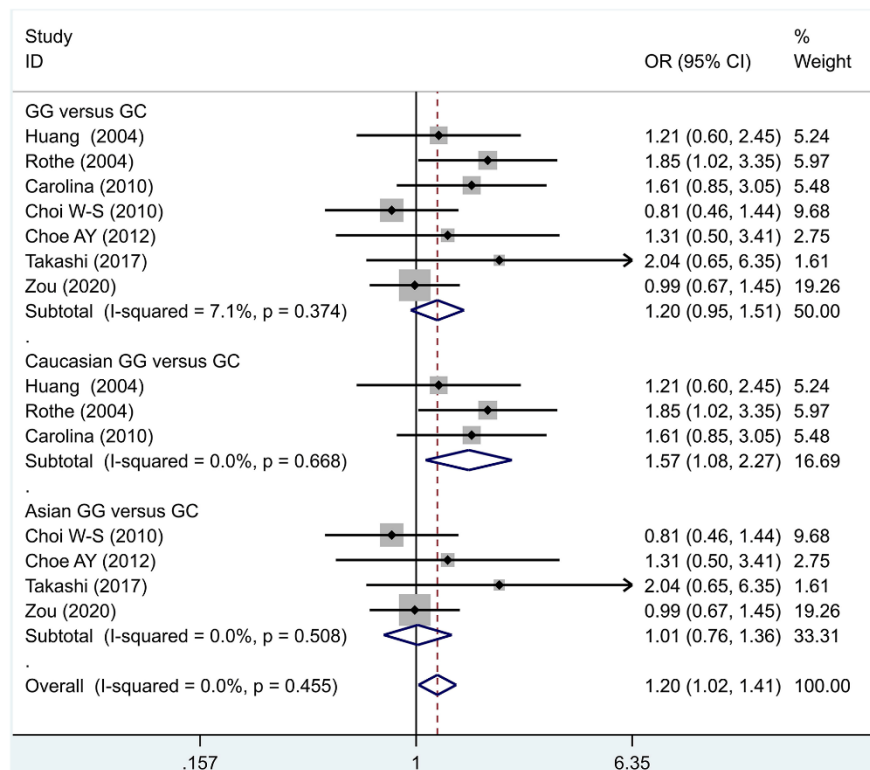

Figure 4. Results of the fixed-effects meta-analysis for the 5-HT1A genotype (GC versus CC) in the PD and control groups.

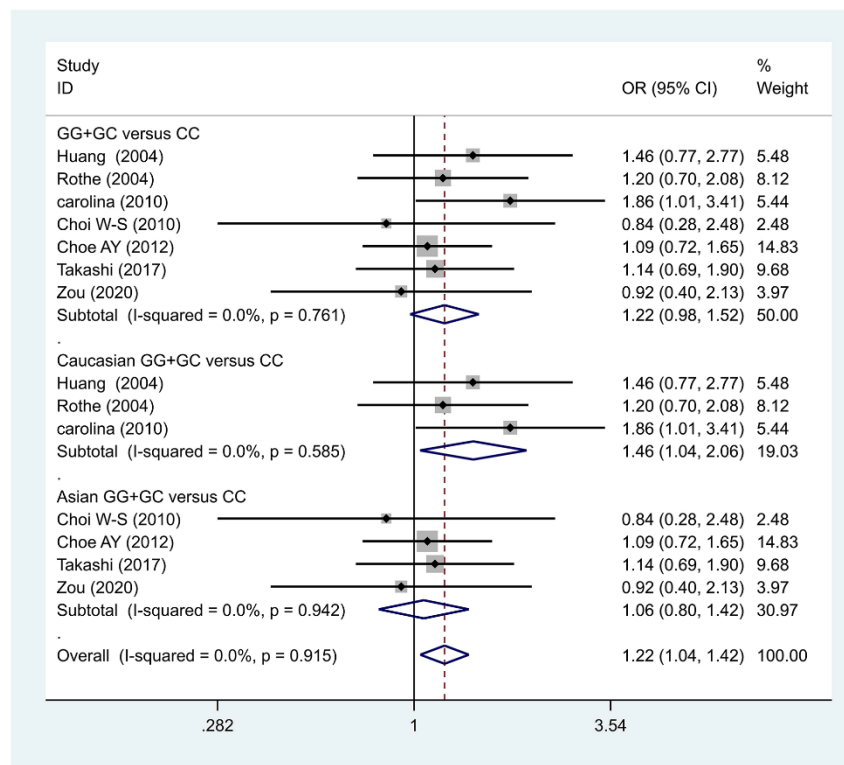

Figure 5. Results of the fixed-effects meta-analysis for the 5-HT1A genotype (GG+GC versus CC) in the PD and control groups.



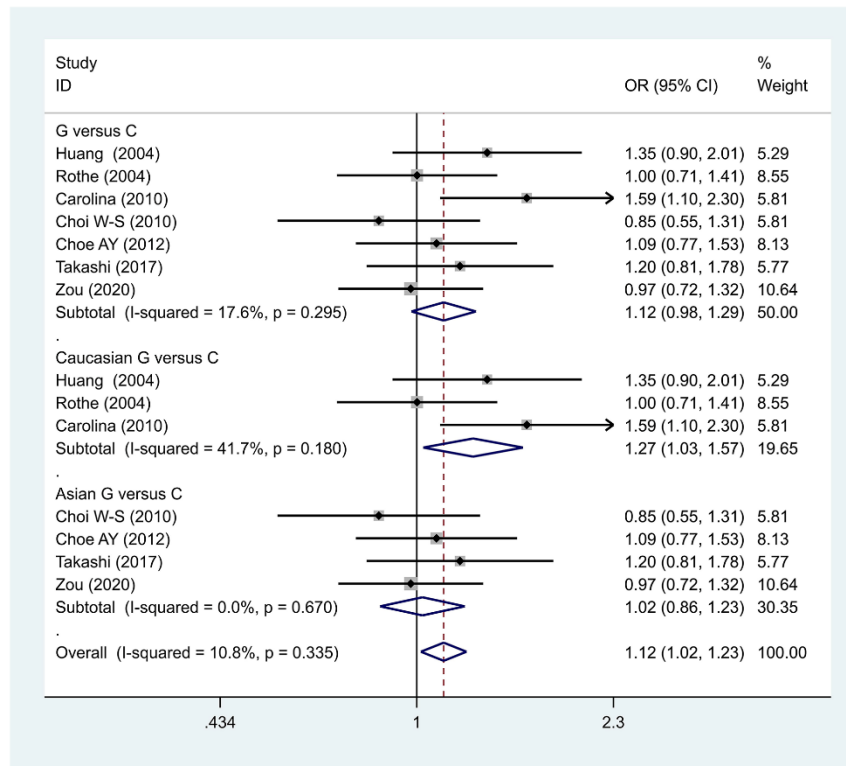

Figure 6. Results of the fixed-effects meta-analysis for the 5-HT1A allele (G vs. C) in the PD and control groups.

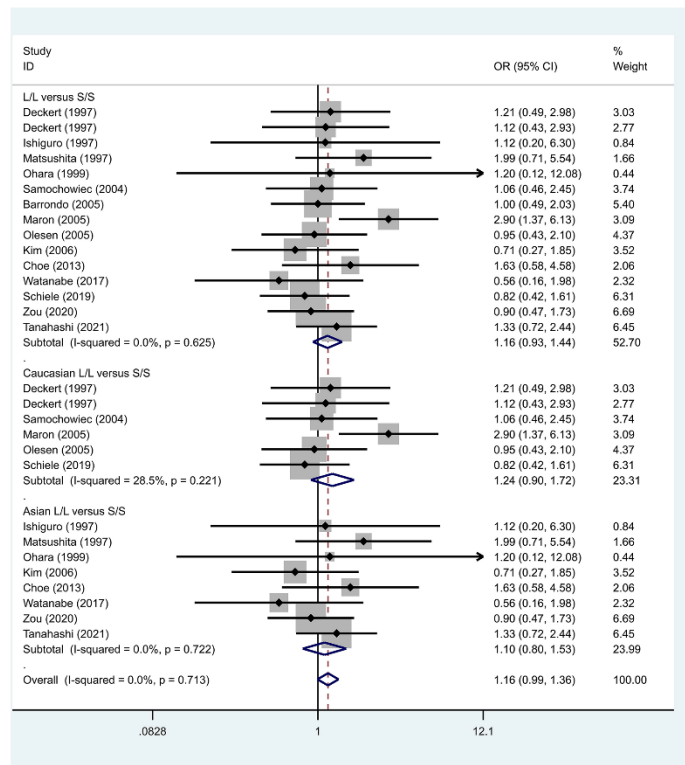

Figure 7. Results of the fixed-effects meta-analysis for the 5-HTTLR genotype (L/L versus S/S) in PD and control groups.

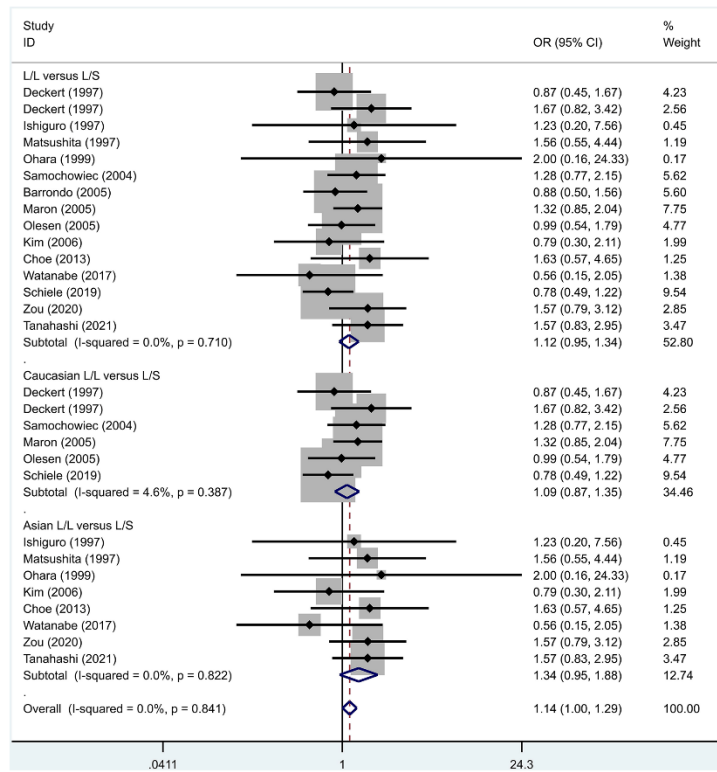

Figure 8. Results of the fixed-effects meta-analysis for the 5-HTTLR genotype (L/L versus L/S) in PD and control groups.

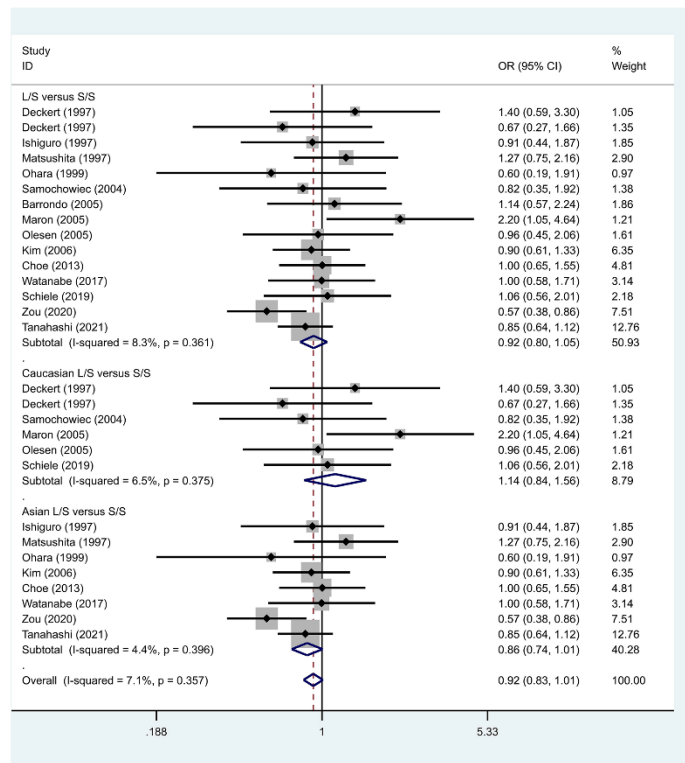

Figure 9. Results of the fixed-effects meta-analysis for the 5-HTTLR genotype (L/S versus S/S) in PD and control groups.



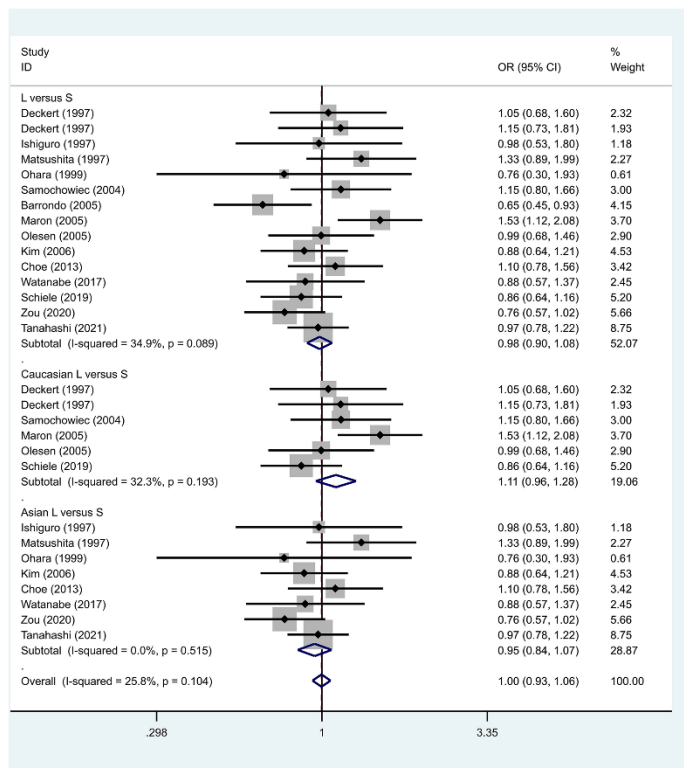

Figure 10. Results of the fixed-effects meta-analysis for the 5-HTTLR genotype (L versus S) in PD and control groups.

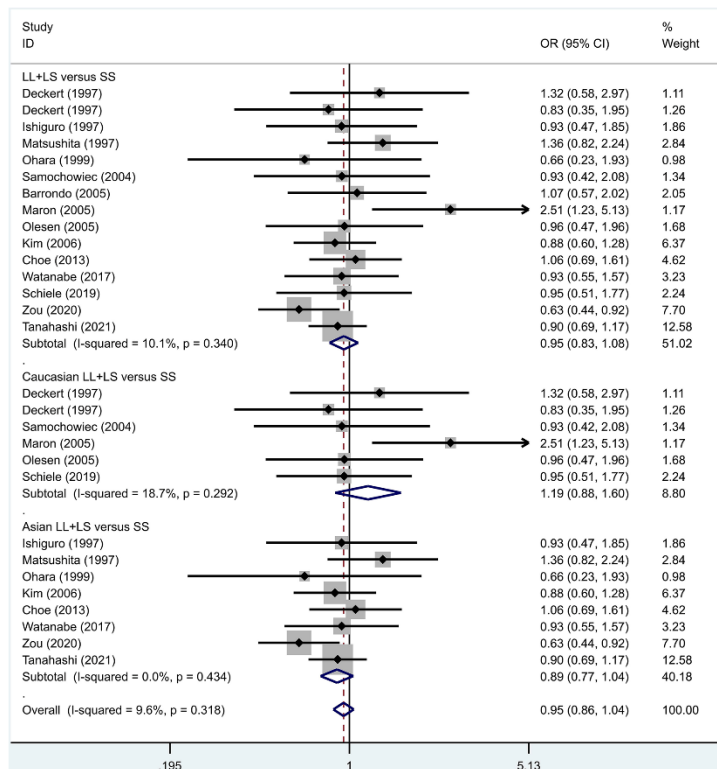

Figure 11. Results of the fixed-effects meta-analysis for the 5-HTTLR genotype (LL+LS versus SS) in PD and control groups.

publication bias on 5-HTTLR analysis results. The test results showed that there was no obvious publication bias and had little influence on the analysis results ( $z=1.24$ ,  $P=0.22$ ).

## DISCUSSION

This is one of the first meta-analyses to investigate the link of *HTR1A* gene C-1019G polymorphisms with PD. We used 5 genotype models in case and control groups for comparative analyses. Further, the genotype-ethnic interaction model was employed to test the link of C-1019G polymorphism with PD in multiple ethnic backgrounds. The G allele or GG genotype is associated with PD in Caucasian patients. Our results showed that the 5-HTT allele frequencies and genotype distributions could not predict susceptibility to PD supporting the findings of a previous meta-analysis [37].

The 5-HT1A receptor functions not only as an autoreceptor but also as a heteroreceptor since it is found both pre-synaptically and post-synaptically. On being activated by 5-HT, the autoreceptor induces a negative feedback loop resulting in hyperpolarization and reduced firing frequency of neurons; this finally leads to lesser production and release of 5-HT. After serotonergic innervation, 5-HT exerts its effects on target neurons via

the 5-HT1A heteroreceptor. Therefore, the 5-HT1A is capable of regulating the level of serotonin both globally and locally [11, 38].

Situated in the promoter region (26 base pair palindrome) of the *HTR1A*, C-1019G SNP rs6295 may affect the transcription of *HTR1A* by binding to deformed epidermal autoregulatory factor-1 (Deaf-1) and hairy enhancer of split 5 (Hes5), which are two key transcription factors. Both deaf-1 and Hes5 can specifically bind to the C allele and inhibit 5-HT1A expression [39–42]. So, the G-1019 is associated with a higher expression of 5-HT1A autoreceptors. Increased G allele and 5-HT1A receptor binding was shown in the different brain areas based on brain imaging results [43]. As a result, the risk of developing PD is increased in patients due to higher desensitization of 5-HT1A autoreceptors, reduced firing by the raphe, and decreased serotonin level [44, 45]. However, in cells with post-synaptic expression of 5-HT1A, the function of Deaf-1 is different in presynaptic neuronal cells compared with the postsynaptic neuronal cells. Deaf-1 binds to the C allele and induces the transcription of *5-HT1A* transcription [46, 47]. The G-1019 allele may inhibit the Deaf-1-mediated transcription of *5-HT1A* and lessen the release of 5-HT, thereby amplifying anxiety symptoms that have a lasting impact on the lives of the patients [48].

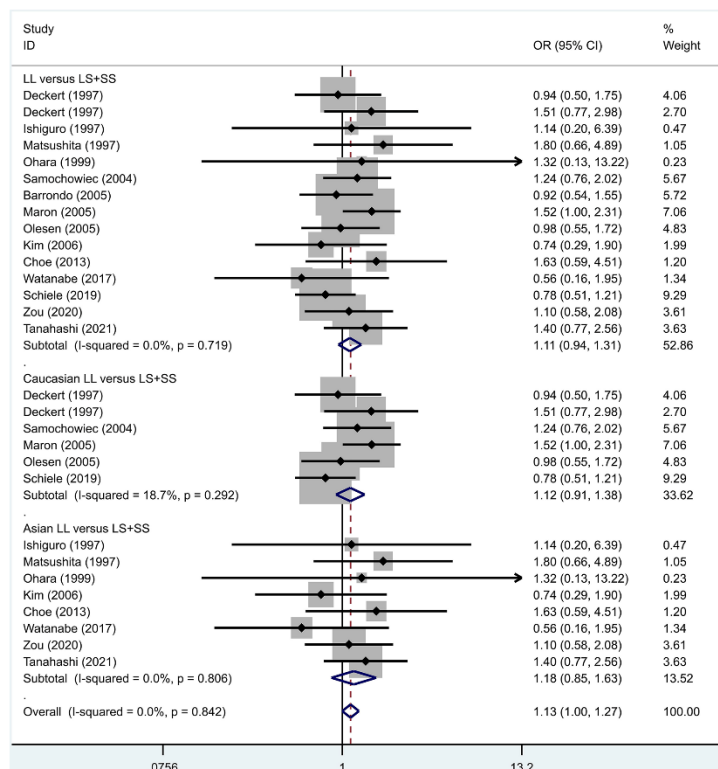

Figure 12. Results of the fixed-effects meta-analysis for the 5-HTTLR genotype (LL versus LS+SS) in PD and control groups.

This finding was validated in human studies. It is plausible that the G/G genotype results in poor clinical outcomes, which may be attenuated by SSRI treatment which desensitizes the overexpressed autoreceptors and leads to stronger activation of 5-HT neurons. This theory was supported by Yevtushenko et al. [49] who showed that the C allele of rs6295 is linked with increased alleviation of symptoms in Caucasian patients with PD. Further, Japanese PD patients who carried the rs6295C/C responded better to paroxetine pharmacotherapy compared with non-carriers [50].

Therefore, the primary causes of reduced serotonergic neurotransmission, one of the important characteristics of PD, are the higher 5-HT1A receptors expression acting pre-synaptically and decreased postsynaptic 5-HT1A and 5-HT positive neurons [51] rs25531 is another A to G SNP, located near the 5-HTTLPR. Compared with the G-allele, rs25531 A results in the higher expression of a transporter gene via a binding site for the AP2 transcription factor [52]. Together with the 5-HTTLPR, the rs25531 leads to the L-A and L-G haplotypes known as bi-allelic or tri-allelic 5-HTTLPR. The L-G haplotype carriers show reduced ISLC6A4 levels compared with the L-A haplotype carriers [53]. However, the long G allele does not have any effect on expression similar to the short allele [54]. Importantly, previous studies concluded that 5-HTTLPR s-allele might be linked with higher amygdala reactivity and fear conditioning [55] which are the hallmarks of PD. We hypothesize that 5-HTTLPR s-allele affects the severity of symptomatic profiles and is not involved in the etiology of PD. This is supported by Strug et al. [56] who also demonstrated the bi-allelic or tri-allelic 5-HTTLPR is implicated in the severity of the symptomatic profiles and not in the etiology of PD.

One of the major limitations of this study is that the gene-gene interactions were not combined in the etiology of PD. It is established that PD is caused by many functional genes, and it is not the effect of a single nucleotide polymorphism [57]. Each gene only confers a minor risk to the disease, and the gene-gene interaction is a complex (G×G) process that affects the development of PD. Thus, future studies should investigate G×G and sub-clinical interactions (such as sex, environment factor, negative life events, and personality) to fully delineate their role in the etiology of PD.

## CONCLUSIONS

It is argued that as far as our findings are concerned, the C-1019G polymorphism correlates with the aetiology of the presence of panic disorder in Caucasians. This meta-analysis did not find any association between 5-HTT polymorphism and PD. However, subgroup analyses

stratified by gender, ethnic background, severity symptoms, and other related gene polymorphisms are warranted to explore their role in the etiology of PD.

## MATERIALS AND METHODS

### Search strategy

PubMed, Web of Science, Embase, Cochrane Library, PsycINFO, and PsycARTICLE databases served as the main databases. The search was carried out for studies until July 2021, the keywords used were “5-HT1A Receptor,” “5-Hydroxytryptamine 1A Receptor”, “5-Hydroxytryptamine 1A Receptor”, “Serotonin 1A Receptor”, “5-HT1A Receptor”, “5-HT1A”, “Panic Disorders (PD)”, “Panic Attacks”, “C(-1019)G” and “rs6295”. The keywords “Serotonin Transporter Promoter (5HTTLPR)”, 5-Hydroxytryptamine Plasma Membrane Transport Serotonin Plasma Membrane Transporter Proteins, Panic Disorder, and Panic Attacks were used to research before December 14, 2021. The retrieved contents also included references to published literature.

### Inclusion criteria

1. Clear diagnostic standards (ICD-10, DSM-IV, DSM-V);
2. Detailed genotype and gene frequency data;
3. All genotypes met Hardy-Weinberg equilibrium (HWE);
4. Case-control experimental study.

### Data extraction

Basic information was extracted, including age, sex, sample size, race, result, inclusion or exclusion criteria, diagnostic criteria, assessment severity criteria, gene frequency, and allele data.

### Data analysis

Statistical software STATA 15.0 was used for analysis, as described by Shang [14]. According to different genotypes, the case group and the healthy control group were statistically analyzed for heterogeneity, the fixed effect model was selected for data with low heterogeneity, and the random effect model was selected for data with large heterogeneity for meta-analysis of dichotomous variables, bias analysis was performed to exclude the effect of publication bias on the results, and the OR value was selected for calculating the risk ratio by statistical analysis.

### Abbreviations

5-HTTLPR: serotonin transporter promoter polymorphism; PD: panic disorder; SSRIs: selective

serotonin-reuptake inhibitors; 5-HTT: serotonin transporter; 5-HTR1A: 5-HT1A receptor; PET: positron emission tomography; SNP: single nucleotide polymorphism; 5-HTT: serotoninergic transporter gene; HWE: Hardy-Weinberg equilibrium.

## AUTHOR CONTRIBUTIONS

Wenli Zhu and Yangying Bu: conceptualization, investigation, writing-original draft, final approval; Wenli Zhu and Lijuan Wu: data curation, methodology, writing-original draft, final approval; Junwei Li: writing-review and editing, final approval; Chuanfu Song and Yihui Hao: supervision, writing-review and editing, final approval.

## CONFLICTS OF INTEREST

The authors declare no conflicts of interest related to this study.

## FUNDING

This research was supported by the projects of Anhui Science and Technology (grant no. 202204295107020065), the Health Commission of Anhui Province (grant no. AHWJ2022b096) and the projects of Wuhu Science and Technology (grant no. 2021jc2-3), and Basic Research on Key Research Programs of Higher Education Institutions in Henan Province (Department of Education of Henan Province) (23A320058).

## REFERENCES

1. Zou Z, Huang Y, Wang J, He Y, Min W, Chen X, Wang J, Zhou B. Association of childhood trauma and panic symptom severity in panic disorder: Exploring the mediating role of alexithymia. *J Affect Disord.* 2016; 206:133–9. <https://doi.org/10.1016/j.jad.2016.07.027> PMID:27474959
2. Kessler RC, Petukhova M, Sampson NA, Zaslavsky AM, Wittchen H-U. Twelve-month and lifetime prevalence and lifetime morbid risk of anxiety and mood disorders in the United States. *Int J Methods Psychiatr Res.* 2012; 21:169–84. <https://doi.org/10.1002/mpr.1359> PMID:22865617
3. Hettrema JM, Neale MC, Kendler KS. A review and meta-analysis of the genetic epidemiology of anxiety disorders. *Am J Psychiatry.* 2001; 158:1568–78. <https://doi.org/10.1176/appi.ajp.158.10.1568> PMID:11578982
4. Graeff FG. Translational approach to the pathophysiology of panic disorder: Focus on serotonin and endogenous opioids. *Neurosci Biobehav Rev.* 2017; 76:48–55. <https://doi.org/10.1016/j.neubiorev.2016.10.013> PMID:28073587
5. Maron E, Shlik J. Serotonin function in panic disorder: important, but why? *Neuropsychopharmacology.* 2006; 31:1–11. <https://doi.org/10.1038/sj.npp.1300880> PMID:16132063
6. Mochcovitch MD, Nardi AE. Selective serotonin-reuptake inhibitors in the treatment of panic disorder: a systematic review of placebo-controlled studies. *Expert Rev Neurother.* 2010; 10:1285–93. <https://doi.org/10.1586/ern.10.110> PMID:20662754
7. Nash JR, Sargent PA, Rabiner EA, Hood SD, Argyropoulos SV, Potokar JP, Grasby PM, Nutt DJ. Serotonin 5-HT1A receptor binding in people with panic disorder: positron emission tomography study. *Br J Psychiatry.* 2008; 193:229–34. <https://doi.org/10.1192/bjp.bp.107.041186> PMID:18757983
8. Rothe C, Gutknecht L, Freitag C, Tauber R, Mössner R, Franke P, Fritze J, Wagner G, Peikert G, Wenda B, Sand P, Jacob C, Rietschel M, et al. Association of a functional 1019C>G 5-HT1A receptor gene polymorphism with panic disorder with agoraphobia. *Int J Neuropsychopharmacol.* 2004; 7:189–92. <https://doi.org/10.1017/S1461145703004061> PMID:14984628
9. Choi WS, Lee BH, Yang JC, Kim YK. Association Study between 5-HT1A Receptor Gene C(-1019)G Polymorphism and Panic Disorder in a Korean Population. *Psychiatry Investig.* 2010; 7:141–6. <https://doi.org/10.4306/pi.2010.7.2.141> PMID:20577624
10. Parks CL, Robinson PS, Sibille E, Shenk T, Toth M. Increased anxiety of mice lacking the serotonin1A receptor. *Proc Natl Acad Sci USA.* 1998; 95:10734–9. <https://doi.org/10.1073/pnas.95.18.10734> PMID:9724773
11. Richardson-Jones JW, Craige CP, Guiard BP, Stephen A, Metzger KL, Kung HF, Gardier AM, Dranovsky A, David DJ, Beck SG, Hen R, Leonardo ED. 5-HT1A autoreceptor levels determine vulnerability to stress and response to antidepressants. *Neuron.* 2010; 65:40–52. <https://doi.org/10.1016/j.neuron.2009.12.003> PMID:20152112
12. Kishi T, Okochi T, Tsunoka T, Okumura T, Kitajima T, Kawashima K, Yamanouchi Y, Kinoshita Y, Naitoh H, Inada T, Kunugi H, Kato T, Yoshikawa T, et al. Serotonin 1A receptor gene, schizophrenia and bipolar disorder:

- an association study and meta-analysis. *Psychiatry Res.* 2011; 185:20–6.  
<https://doi.org/10.1016/j.psychres.2010.06.003>  
PMID:[20594600](https://pubmed.ncbi.nlm.nih.gov/20594600/)
13. Strobel A, Gutknecht L, Rothe C, Reif A, Mössner R, Zeng Y, Brocke B, Lesch KP. Allelic variation in 5-HT1A receptor expression is associated with anxiety- and depression-related personality traits. *J Neural Transm (Vienna)*. 2003; 110:1445–53.  
<https://doi.org/10.1007/s00702-003-0072-0>  
PMID:[14666415](https://pubmed.ncbi.nlm.nih.gov/14666415/)
14. Zhao X, Huang Y, Li J, Ma H, Jin Q, Wang Y, Wu L, Zhu G. Association between the 5-HT1A receptor gene polymorphism (rs6295) and antidepressants: a meta-analysis. *Int Clin Psychopharmacol*. 2012; 27:314–20.  
<https://doi.org/10.1097/YIC.0b013e32835818bf>  
PMID:[22890315](https://pubmed.ncbi.nlm.nih.gov/22890315/)
15. Lesch KP, Balling U, Gross J, Strauss K, Wolozin BL, Murphy DL, Riederer P. Organization of the human serotonin transporter gene. *J Neural Transm Gen Sect*. 1994; 95:157–62.  
<https://doi.org/10.1007/BF01276434>  
PMID:[7865169](https://pubmed.ncbi.nlm.nih.gov/7865169/)
16. Heils A, Teufel A, Petri S, Stöber G, Riederer P, Bengel D, Lesch KP. Allelic variation of human serotonin transporter gene expression. *J Neurochem*. 1996; 66:2621–4.  
<https://doi.org/10.1046/j.1471-4159.1996.66062621.x>  
PMID:[8632190](https://pubmed.ncbi.nlm.nih.gov/8632190/)
17. Abou Al Hassan S, Cutinha D, Mattar L. The impact of COMT, BDNF and 5-HTT brain-genes on the development of anorexia nervosa: a systematic review. *Eat Weight Disord*. 2021; 26:1323–44.  
<https://doi.org/10.1007/s40519-020-00978-5>  
PMID:[32783113](https://pubmed.ncbi.nlm.nih.gov/32783113/)
18. López-Echeverri YP, Cardona-Londoño KJ, Garcia-Aguirre JF, Orrego-Cardozo M. Effects of Serotonin Transporter and Receptor Polymorphisms on Depression. *Rev Colomb Psiquiatr (Engl Ed)*. 2021; S0034-7450(21)00135-9. [Epub ahead of print].  
<https://doi.org/10.1016/j.rcp.2021.07.006>  
PMID:[34493397](https://pubmed.ncbi.nlm.nih.gov/34493397/)
19. Tommasi M, Sergi MR, Konstantinidou F, Franzago M, Pesce M, Fratta I, Grilli A, Stuppia L, Picconi L, Saggino A, Gatta V. Association of COMT, BDNF and 5-HTT functional polymorphisms with personality characteristics. *Front Biosci (Landmark Ed)*. 2021; 26:1064–74.  
<https://doi.org/10.52586/5009> PMID:[34856753](https://pubmed.ncbi.nlm.nih.gov/34856753/)
20. Valderrama J, Miranda R. Early life stress predicts negative urgency through brooding, depending on 5-HTTLPR genotype: A pilot study with 6-month follow-up examining suicide ideation. *Psychiatry Res.* 2017; 258:481–7.  
<https://doi.org/10.1016/j.psychres.2017.08.092>  
PMID:[28890225](https://pubmed.ncbi.nlm.nih.gov/28890225/)
21. Blaya C, Salum GA, Moorjani P, Seganfredo AC, Heldt E, Leistner-Segal S, Smoller JW, Manfro GG. Panic disorder and serotonergic genes (SLC6A4, HTR1A and HTR2A): Association and interaction with childhood trauma and parenting. *Neurosci Lett*. 2010; 485:11–5.  
<https://doi.org/10.1016/j.neulet.2010.08.042>  
PMID:[20817074](https://pubmed.ncbi.nlm.nih.gov/20817074/)
22. Choe AY, Kim B, Lee KS, Lee JE, Lee JY, Choi TK, Lee SH. Serotonergic genes (5-HTT and HTR1A) and separation life events: gene-by-environment interaction for panic disorder. *Neuropsychobiology*. 2013; 67:192–200.  
<https://doi.org/10.1159/000347084> PMID:[23635830](https://pubmed.ncbi.nlm.nih.gov/23635830/)
23. Huang YY, Battistuzzi C, Oquendo MA, Harkavy-Friedman J, Greenhill L, Zalsman G, Brodsky B, Arango V, Brent DA, Mann JJ. Human 5-HT1A receptor C(-1019)G polymorphism and psychopathology. *Int J Neuropsychopharmacol*. 2004; 7:441–51.  
<https://doi.org/10.1017/S1461145704004663>  
PMID:[15469667](https://pubmed.ncbi.nlm.nih.gov/15469667/)
24. Tanahashi S, Tanii H, Konishi Y, Otowa T, Sasaki T, Tochigi M, Okazaki Y, Kaiya H, Okada M. Association of Serotonin Transporter Gene (5-HTTLPR/rs25531) Polymorphism with Comorbidities of Panic Disorder. *Neuropsychobiology*. 2021; 80:333–41.  
<https://doi.org/10.1159/000512699> PMID:[33333511](https://pubmed.ncbi.nlm.nih.gov/33333511/)
25. Zou Z, Huang Y, Wang J, Min W, Zhou B. The association between serotonin-related gene polymorphisms and susceptibility and early sertraline response in patients with panic disorder. *BMC Psychiatry*. 2020; 20:388.  
<https://doi.org/10.1186/s12888-020-02790-y>  
PMID:[32723321](https://pubmed.ncbi.nlm.nih.gov/32723321/)
26. Deckert J, Catalano M, Heils A, Di Bella D, Friess F, Politi E, Franke P, Nöthen MM, Maier W, Bellodi L, Lesch KP. Functional promoter polymorphism of the human serotonin transporter: lack of association with panic disorder. *Psychiatr Genet*. 1997; 7:45–7.  
<https://doi.org/10.1097/00041444-199707010-00008>  
PMID:[9264139](https://pubmed.ncbi.nlm.nih.gov/9264139/)
27. Ishiguro H, Arinami T, Yamada K, Otsuka Y, Toru M, Shibuya H. An association study between a transcriptional polymorphism in the serotonin transporter gene and panic disorder in a Japanese population. *Psychiatry Clin Neurosci*. 1997; 51:333–5.  
<https://doi.org/10.1111/j.1440-1819.1997.tb03208.x>  
PMID:[9413883](https://pubmed.ncbi.nlm.nih.gov/9413883/)
28. Matsushita S, Muramatsu T, Kimura M, Shirakawa O, Mita T, Nakai T, Higuchi S. Serotonin transporter gene



- regulatory region polymorphism and panic disorder. *Mol Psychiatry*. 1997; 2:390–2.  
<https://doi.org/10.1038/sj.mp.4000303>  
PMID:[9322231](https://pubmed.ncbi.nlm.nih.gov/9322231/)
29. Ohara K, Suzuki Y, Ochiai M, Tsukamoto T, Tani K, Ohara K. A variable-number-tandem-repeat of the serotonin transporter gene and anxiety disorders. *Prog Neuropsychopharmacol Biol Psychiatry*. 1999; 23:55–65.  
[https://doi.org/10.1016/s0278-5846\(98\)00091-8](https://doi.org/10.1016/s0278-5846(98)00091-8)  
PMID:[10368856](https://pubmed.ncbi.nlm.nih.gov/10368856/)
30. Samochowiec J, Hajduk A, Samochowiec A, Horodnicki J, Stepień G, Grzywacz A, Kucharska-Mazur J. Association studies of MAO-A, COMT, and 5-HTT genes polymorphisms in patients with anxiety disorders of the phobic spectrum. *Psychiatry Res*. 2004; 128:21–6.  
<https://doi.org/10.1016/j.psychres.2004.05.012>  
PMID:[15450911](https://pubmed.ncbi.nlm.nih.gov/15450911/)
31. Maron E, Lang A, Tasa G, Liivlaid L, Tõru I, Must A, Vasar V, Shlik J. Associations between serotonin-related gene polymorphisms and panic disorder. *Int J Neuropsychopharmacol*. 2005; 8:261–6.  
<https://doi.org/10.1017/S1461145704004985>  
PMID:[15670397](https://pubmed.ncbi.nlm.nih.gov/15670397/)
32. Martínez-Barrondo S, Saiz PA, Morales B, García-Portilla MP, Coto E, Alvarez V, Bobes J. Serotonin gene polymorphisms in patients with panic disorder. *Actas Esp Psiquiatr*. 2005; 33:210–5.  
PMID:[15999296](https://pubmed.ncbi.nlm.nih.gov/15999296/)
33. Olesen OF, Bennike B, Hansen ES, Koefoed P, Woldbye DP, Bolwig TG, Mellerup E. The short/long polymorphism in the serotonin transporter gene promoter is not associated with panic disorder in a Scandinavian sample. *Psychiatr Genet*. 2005; 15:159.  
<https://doi.org/10.1097/00041444-200509000-00003>  
PMID:[16094247](https://pubmed.ncbi.nlm.nih.gov/16094247/)
34. Kim W, Choi YH, Yoon KS, Cho DY, Pae CU, Woo JM. Tryptophan hydroxylase and serotonin transporter gene polymorphism does not affect the diagnosis, clinical features and treatment outcome of panic disorder in the Korean population. *Prog Neuropsychopharmacol Biol Psychiatry*. 2006; 30:1413–8.  
<https://doi.org/10.1016/j.pnpbp.2006.05.017>  
PMID:[16822601](https://pubmed.ncbi.nlm.nih.gov/16822601/)
35. Watanabe T, Ishiguro S, Aoki A, Ueda M, Hayashi Y, Akiyama K, Kato K, Shimoda K. Genetic Polymorphism of 1019C/G (rs6295) Promoter of Serotonin 1A Receptor and Catechol-O-Methyltransferase in Panic Disorder. *Psychiatry Investig*. 2017; 14:86–92.  
<https://doi.org/10.4306/pi.2017.14.1.86>  
PMID:[28096880](https://pubmed.ncbi.nlm.nih.gov/28096880/)
36. Schiele MA, Herzog K, Kollert L, Böhnlein J, Reppele J, Rosenkranz K, Leehr EJ, Ziegler C, Lueken U, Dannlowski U, Pauli P, Arolt V, Zwanzger P, et al. Affective temperaments (TEMPS-A) in panic disorder and healthy probands: Genetic modulation by 5-HTT variation. *World J Biol Psychiatry*. 2020; 21:790–6.  
<https://doi.org/10.1080/15622975.2019.1705999>  
PMID:[31852378](https://pubmed.ncbi.nlm.nih.gov/31852378/)
37. Blaya C, Salum GA, Lima MS, Leistner-Segal S, Manfro GG. Lack of association between the Serotonin Transporter Promoter Polymorphism (5-HTTLPR) and Panic Disorder: a systematic review and meta-analysis. *Behav Brain Funct*. 2007; 3:41.  
<https://doi.org/10.1186/1744-9081-3-41>  
PMID:[17705872](https://pubmed.ncbi.nlm.nih.gov/17705872/)
38. Hjorth S, Bengtsson HJ, Kullberg A, Carlzon D, Peilot H, Auerbach SB. Serotonin autoreceptor function and antidepressant drug action. *J Psychopharmacol*. 2000; 14:177–85.  
<https://doi.org/10.1177/026988110001400208>  
PMID:[10890313](https://pubmed.ncbi.nlm.nih.gov/10890313/)
39. Lemonde S, Turecki G, Bakish D, Du L, Hrdina PD, Bown CD, Sequeira A, Kushwaha N, Morris SJ, Basak A, Ou XM, Albert PR. Impaired repression at a 5-hydroxytryptamine 1A receptor gene polymorphism associated with major depression and suicide. *J Neurosci*. 2003; 23:8788–99.  
<https://doi.org/10.1523/JNEUROSCI.23-25-08788.2003>  
PMID:[14507979](https://pubmed.ncbi.nlm.nih.gov/14507979/)
40. Albert PR, Lemonde S. 5-HT1A receptors, gene repression, and depression: guilt by association. *Neuroscientist*. 2004; 10:575–93.  
<https://doi.org/10.1177/1073858404267382>  
PMID:[15534042](https://pubmed.ncbi.nlm.nih.gov/15534042/)
41. Czesak M, Lemonde S, Peterson EA, Rogaeva A, Albert PR. Cell-specific repressor or enhancer activities of Deaf-1 at a serotonin 1A receptor gene polymorphism. *J Neurosci*. 2006; 26:1864–71.  
<https://doi.org/10.1523/JNEUROSCI.2643-05.2006>  
PMID:[16467535](https://pubmed.ncbi.nlm.nih.gov/16467535/)
42. Szewczyk B, Albert PR, Burns AM, Czesak M, Overholser JC, Jurjus GJ, Meltzer HY, Konick LC, Dieter L, Herbst N, May W, Rajkowska G, Stockmeier CA, Austin MC. Gender-specific decrease in NUDR and 5-HT1A receptor proteins in the prefrontal cortex of subjects with major depressive disorder. *Int J Neuropsychopharmacol*. 2009; 12:155–68.  
<https://doi.org/10.1017/S1461145708009012>  
PMID:[18561871](https://pubmed.ncbi.nlm.nih.gov/18561871/)
43. Parsey RV, Olvet DM, Oquendo MA, Huang YY, Ogden RT, Mann JJ. Higher 5-HT1A receptor binding potential during a major depressive episode predicts poor treatment response: preliminary data from a



- naturalistic study. *Neuropsychopharmacology*. 2006; 31:1745–9.  
<https://doi.org/10.1038/sj.npp.1300992>  
PMID:[16395308](https://pubmed.ncbi.nlm.nih.gov/16395308/)
44. Riad M, Zimmer L, Rbah L, Watkins KC, Hamon M, Descarries L. Acute treatment with the antidepressant fluoxetine internalizes 5-HT1A autoreceptors and reduces the *in vivo* binding of the PET radioligand [18F]MPPF in the nucleus raphe dorsalis of rat. *J Neurosci*. 2004; 24:5420–6.  
<https://doi.org/10.1523/JNEUROSCI.0950-04.2004>  
PMID:[15190115](https://pubmed.ncbi.nlm.nih.gov/15190115/)
45. Courtney NA, Ford CP. Mechanisms of 5-HT1A receptor-mediated transmission in dorsal raphe serotonin neurons. *J Physiol*. 2016; 594:953–65.  
<https://doi.org/10.1113/JP271716> PMID:[26634643](https://pubmed.ncbi.nlm.nih.gov/26634643/)
46. Albert PR. Transcriptional regulation of the 5-HT1A receptor: implications for mental illness. *Philos Trans R Soc Lond B Biol Sci*. 2012; 367:2402–15.  
<https://doi.org/10.1098/rstb.2011.0376>  
PMID:[22826341](https://pubmed.ncbi.nlm.nih.gov/22826341/)
47. Albert PR, Fiori LM. Transcriptional dys-regulation in anxiety and major depression: 5-HT1A gene promoter architecture as a therapeutic opportunity. *Curr Pharm Des*. 2014; 20:3738–50.  
<https://doi.org/10.2174/13816128113196660740>  
PMID:[24180393](https://pubmed.ncbi.nlm.nih.gov/24180393/)
48. Gross C, Zhuang X, Stark K, Ramboz S, Oosting R, Kirby L, Santarelli L, Beck S, Hen R. Serotonin1A receptor acts during development to establish normal anxiety-like behaviour in the adult. *Nature*. 2002; 416:396–400.  
<https://doi.org/10.1038/416396a> PMID:[11919622](https://pubmed.ncbi.nlm.nih.gov/11919622/)
49. Yevtushenko OO, Oros MM, Reynolds GP. Early response to selective serotonin reuptake inhibitors in panic disorder is associated with a functional 5-HT1A receptor gene polymorphism. *J Affect Disord*. 2010; 123:308–11.  
<https://doi.org/10.1016/j.jad.2009.09.007>  
PMID:[19800133](https://pubmed.ncbi.nlm.nih.gov/19800133/)
50. Ishiguro S, Watanabe T, Ueda M, Saeki Y, Hayashi Y, Akiyama K, Saito A, Kato K, Inoue Y, Shimoda K. Determinants of pharmacodynamic trajectory of the therapeutic response to paroxetine in Japanese patients with panic disorder. *Eur J Clin Pharmacol*. 2011; 67:1213–21.  
<https://doi.org/10.1007/s00228-011-1073-9>  
PMID:[21688171](https://pubmed.ncbi.nlm.nih.gov/21688171/)
51. Le François B, Czesak M, Steubl D, Albert PR. Transcriptional regulation at a HTR1A polymorphism associated with mental illness. *Neuropharmacology*. 2008; 55:977–85.  
<https://doi.org/10.1016/j.neuropharm.2008.06.046>  
PMID:[18639564](https://pubmed.ncbi.nlm.nih.gov/18639564/)
52. Ehli EA, Hu Y, Lengyel-Nelson T, Hudziak JJ, Davies GE. Identification and functional characterization of three novel alleles for the serotonin transporter-linked polymorphic region. *Mol Psychiatry*. 2012; 17:185–92.  
<https://doi.org/10.1038/mp.2010.130>  
PMID:[21200389](https://pubmed.ncbi.nlm.nih.gov/21200389/)
53. Lipsky RH, Hu XZ, Goldman D. Additional functional variation at the SLC6A4 gene. *Am J Med Genet B Neuropsychiatr Genet*. 2009; 150:153.  
<https://doi.org/10.1002/ajmg.b.30766>  
PMID:[18444253](https://pubmed.ncbi.nlm.nih.gov/18444253/)
54. Philibert RA, Sandhu H, Hollenbeck N, Gunter T, Adams W, Madan A. The relationship of 5HTT (SLC6A4) methylation and genotype on mRNA expression and liability to major depression and alcohol dependence in subjects from the Iowa Adoption Studies. *Am J Med Genet B Neuropsychiatr Genet*. 2008; 147:543–9.  
<https://doi.org/10.1002/ajmg.b.30657>  
PMID:[17987668](https://pubmed.ncbi.nlm.nih.gov/17987668/)
55. Gorman JM, Kent JM, Sullivan GM, Coplan JD. Neuroanatomical hypothesis of panic disorder, revised. *Am J Psychiatry*. 2000; 157:493–505.  
<https://doi.org/10.1176/appi.ajp.157.4.493>  
PMID:[10739407](https://pubmed.ncbi.nlm.nih.gov/10739407/)
56. Strug LJ, Suresh R, Fyer AJ, Talati A, Adams PB, Li W, Hodge SE, Gilliam TC, Weissman MM. Panic disorder is associated with the serotonin transporter gene (SLC6A4) but not the promoter region (5-HTTLPR). *Mol Psychiatry*. 2010; 15:166–76.  
<https://doi.org/10.1038/mp.2008.79>  
PMID:[18663369](https://pubmed.ncbi.nlm.nih.gov/18663369/)
57. Zwanzger P, Domschke K, Bradwejn J. Neuronal network of panic disorder: the role of the neuropeptide cholecystokinin. *Depress Anxiety*. 2012; 29:762–74.  
<https://doi.org/10.1002/da.21919>  
PMID:[22553078](https://pubmed.ncbi.nlm.nih.gov/22553078/)

## SUPPLEMENTARY MATERIALS

### Supplementary Tables

**Supplementary Table 1. The characteristics of included studies explore the relationship between the 5-HT1A C-1019G polymorphism and PD.**

|                              | Sample size<br>(Case/control) | Sex<br>(male/female) | Age<br>(mean±SD)<br>(case/control) | Design                    | Exclusion<br>criteria                                                                                                                                                                                                                                                                                                                                                                                                                                                                                                                                                | Inclusion criteria                                                                                                                                                                                                                                                                                                                                                                                                                                                                                                                                                   | Diagnosis<br>criteria                                                                      | measure to<br>assess<br>symptom<br>severity |
|------------------------------|-------------------------------|----------------------|------------------------------------|---------------------------|----------------------------------------------------------------------------------------------------------------------------------------------------------------------------------------------------------------------------------------------------------------------------------------------------------------------------------------------------------------------------------------------------------------------------------------------------------------------------------------------------------------------------------------------------------------------|----------------------------------------------------------------------------------------------------------------------------------------------------------------------------------------------------------------------------------------------------------------------------------------------------------------------------------------------------------------------------------------------------------------------------------------------------------------------------------------------------------------------------------------------------------------------|--------------------------------------------------------------------------------------------|---------------------------------------------|
| Huang<br>et al.<br>(2004)    | 194<br>(87/107)               | Not<br>mentioned     | Not mentioned<br>39.0±15.0         | Case-<br>control<br>study | Drug that may affect<br>5-HT1A Binding was<br>excluded.                                                                                                                                                                                                                                                                                                                                                                                                                                                                                                              | -                                                                                                                                                                                                                                                                                                                                                                                                                                                                                                                                                                    | DSM -IV                                                                                    | Not<br>mentioned                            |
| Rothe<br>et al.<br>(2004)    | 268<br>(134/134)              | 98/169               | 37.3±10.8<br>41.0±11.0             | Case-<br>control<br>study | -                                                                                                                                                                                                                                                                                                                                                                                                                                                                                                                                                                    | Patients with<br>predominant panic<br>disorder. The controls<br>were unrelated,<br>anonymous blood<br>donors.<br>1) >90% genotype<br>call rate;<br>2) minor allele<br>frequency<br>(MAF) >5%;<br>3) Hardy–Weinberg<br>equilibrium $p >$<br>0.001.<br>Three duplicates<br>were assessed in the<br>experiment and 100%<br>concordance in<br>genotypes was seen.                                                                                                                                                                                                        | DSM -IIIR /<br>DSM -IV                                                                     | Not<br>mentioned                            |
| Carolina<br>et al.<br>(2010) | 232<br>(107/125)              | 62/170               | 39.94±10.17                        | Case-<br>control<br>study | -                                                                                                                                                                                                                                                                                                                                                                                                                                                                                                                                                                    | 1) Panic disorder patients<br>who had comorbidity<br>with mood disorders or<br>other psychiatric<br>disorders were excluded.<br>2) The patients who had<br>a family history of<br>psychiatric disorders<br>were excluded except for<br>anxiety disorders.<br>The patients who had<br>medical diseases were<br>also excluded.<br>Exclusion criteria<br>included any history of<br>schizophrenia, bipolar<br>disorder, alcohol and<br>substance abuse or<br>dependence, mental<br>retardation, and current<br>or past serious medical<br>or neurological<br>disorders. | the Mini<br>International<br>Neuropsychiatry<br>Interview (MINI)<br>– Brazilian<br>version | Not<br>mentioned                            |
| Choi et al.<br>(2010)        | 155<br>(94/111)               | 104/101              | 40.1±9.5,<br>38.3±7.3              | Case-<br>control<br>study | 1) Panic disorder patients<br>who had comorbidity<br>with mood disorders or<br>other psychiatric<br>disorders were excluded.<br>2) The patients who had<br>a family history of<br>psychiatric disorders<br>were excluded except for<br>anxiety disorders.<br>The patients who had<br>medical diseases were<br>also excluded.<br>Exclusion criteria<br>included any history of<br>schizophrenia, bipolar<br>disorder, alcohol and<br>substance abuse or<br>dependence, mental<br>retardation, and current<br>or past serious medical<br>or neurological<br>disorders. | -                                                                                                                                                                                                                                                                                                                                                                                                                                                                                                                                                                    | DSM -IV                                                                                    | STAI,<br>PDSS, ASI,<br>API,<br>HAMA         |
| Choe<br>et al.<br>(2012)     | 366<br>(194/172)              | 133/181              | 18–75                              | Case-<br>control<br>study | 1) axis I diagnosis other<br>than PD; 2) axis II<br>diagnosis; 3) severe<br>physical illness or major<br>laboratory test<br>abnormalities; 4) suicide<br>risk; 5) history of<br>substance abuse                                                                                                                                                                                                                                                                                                                                                                      | -                                                                                                                                                                                                                                                                                                                                                                                                                                                                                                                                                                    | DSM -IV                                                                                    | ASI-R                                       |
| Takashi<br>et al.<br>(2017)  | 238<br>(119/119)              | 46/152               | 35.45±9.50<br>35.11±9.95           | Case-<br>control<br>study | 1) axis I diagnosis other<br>than PD; 2) axis II<br>diagnosis; 3) severe<br>physical illness or major<br>laboratory test<br>abnormalities; 4) suicide<br>risk; 5) history of<br>substance abuse                                                                                                                                                                                                                                                                                                                                                                      | -                                                                                                                                                                                                                                                                                                                                                                                                                                                                                                                                                                    | DSM-IV-TR                                                                                  | Not<br>mentioned                            |

|                      |                  |                  |                              |                           |                                                                                                                                                                                                                                               |   |        |      |
|----------------------|------------------|------------------|------------------------------|---------------------------|-----------------------------------------------------------------------------------------------------------------------------------------------------------------------------------------------------------------------------------------------|---|--------|------|
| Zou et al.<br>(2020) | 464<br>(233/231) | Not<br>mentioned | 35.65 ± 9.77<br>36.96 ± 7.82 | Case-<br>control<br>study | Patients with<br>neurological diseases,<br>and/or past or current<br>episodes of MDD,<br>generalized anxiety<br>disorder (GAD), manic<br>disorder, bipolar<br>disorder, schizophrenia<br>or any other psychiatric<br>disorders were excluded. | - | DSM-IV | PDSS |
|----------------------|------------------|------------------|------------------------------|---------------------------|-----------------------------------------------------------------------------------------------------------------------------------------------------------------------------------------------------------------------------------------------|---|--------|------|

---

**Supplementary Table 2. The characteristics of included studies explore the relationship between the 5-HTTLR polymorphism and PD.**

|                    | Sample size (case/control) | Sex (male/female)   | Age (mean±SD) (years) |             | Design             | Exclusion criteria                                                                                                                      | Inclusion criteria                                                                                                                                                                          | Diagnosis criteria | Measure to assess symptom severity |
|--------------------|----------------------------|---------------------|-----------------------|-------------|--------------------|-----------------------------------------------------------------------------------------------------------------------------------------|---------------------------------------------------------------------------------------------------------------------------------------------------------------------------------------------|--------------------|------------------------------------|
|                    |                            |                     | Case                  | Control     |                    |                                                                                                                                         |                                                                                                                                                                                             |                    |                                    |
| Deckert I (1997)   | 175 (85/90)                | Not mentioned       | Not mentioned         |             | Case-control study | -                                                                                                                                       | 1) Patients met the DSM-III-R criteria for panic disorder.<br>2) The controls who had unrelated                                                                                             | DSM - III-R        | Not mentioned                      |
| Deckert II (1997)  | 152 (73/79)                | Not mentioned       | Not mentioned         |             | Case-control study | -                                                                                                                                       | 1) Patients met the DSM-III-R criteria for panic disorder.<br>2) The controls who had unrelated                                                                                             | DSM - III-R        | Not mentioned                      |
| Ishiguro (1997)    | 216 (66/150)               | 30/33<br>70/80      | 27-79                 | 25-74       | Case-control study | -                                                                                                                                       | 1) Patients met the DSM-IV criteria for panic disorder.                                                                                                                                     | DSM - III-R        | Not mentioned                      |
| Matsushita (1997)  | 299 (86/213)               | 54/32<br>96/117     | 37.0 ± 12.1           | 37.7 ± 13.1 | Case-control study | -                                                                                                                                       | 1) Patients met the DSM-III-R criteria for panic disorder.<br>2) The controls who had unrelated                                                                                             | DSM - III-R        | Not mentioned                      |
| Ohara (1999)       | 133 (27/106)               | 11/16<br>47/59      | 38.7±10.5             | 35.6±11.6   | Case-control study | -                                                                                                                                       | 1) Patients met the DSM-IV criteria for panic disorder.<br>2) The controls had no history of psychiatric diseases or psychotropic medication in the past.                                   | DSM -IV            | Not mentioned                      |
| Samochowiec (2004) | 357 (191 /166)             | 54 /148             | 38.7±11.8             | 35.9±14.3   | Case-control study | 1) Subjects with a history of a primary major psychiatric disorder or substance dependence other than nicotine dependence were excluded | -                                                                                                                                                                                           | ICD-10             | Not mentioned                      |
| Barrondo (2005)    | 238 (119/119)              | 28/64<br>67/107     | 35.87±12.38           | 38.40 ±8.94 | Case-control study | -                                                                                                                                       | 1) Patients met the DSM-IV criteria for panic disorder.                                                                                                                                     | DSM -IV            | Not mentioned                      |
| Maron (2005)       | 373 (158/215)              | 32/ 126<br>56/159   | 38.0±12.9             | 39.8±13.0   | Case-control study | -                                                                                                                                       | 1) Patients met the DSM-IV criteria for panic disorder.<br>2) Only healthy subjects without personal or family history of psychiatric disorders among first-degree relatives were included. | DSM -IV            | Not mentioned                      |
| Olesen (2005)      | 212 (104/108)              | 28/76<br>30/78      | Not mentioned         |             | Case-control study | -                                                                                                                                       | 1) Patients met the DSM-IV criteria for panic disorder.<br>2) Patients were unrelated Scandinavians with a Caucasian genetic background.                                                    | DSM -IV            | Not mentioned                      |
| Kim (2006)         | 471 (244/227)              | 143/101<br>102 /125 | 36.1 ± 9.0            | 33.1 ± 9.1  | Case-control study | -                                                                                                                                       | 1) Patients met the DSM-IV criteria for panic disorder.<br>2) Patients with comorbid major depressive disorder were also included.                                                          | DSM -IV            | Not mentioned                      |

|                  |                 |                  |             |             |                    |                                                                                                                                                                                         |                                                                                                                                                                                                    |            |               |
|------------------|-----------------|------------------|-------------|-------------|--------------------|-----------------------------------------------------------------------------------------------------------------------------------------------------------------------------------------|----------------------------------------------------------------------------------------------------------------------------------------------------------------------------------------------------|------------|---------------|
| Choe (2013)      | 357 (191 /166)  | Not mentioned    | 18-75       |             | Case-control study | 1) any history of schizophrenia, bipolar disorder alcohol and substance abuse or dependence, mental retardation, and current or past serious medical or neurological disorders          | -                                                                                                                                                                                                  | DSM -IV    | Not mentioned |
| Watanabe (2017)  | 238 (119/119)   | 43/76 /43/76     | 35.45±9.50  | 35.11±9.95  | Case-control study | 1) axis I diagnosis other than PD;<br>2) axis II diagnosis;<br>3) severe physical illness or major laboratory test abnormalities;<br>4) suicide risk;<br>5) history of substance abuse. | -                                                                                                                                                                                                  | DSM -IV-TR | Not mentioned |
| Schiele (2019)   | 287 (109/536)   | 40/ 69 /153/383  | 36.2±10.9   | 25.2±5.6    | Case-control study | 1) past or present diagnosis of any DSM-IV axis I disorder as ascertained by the Mini International Psychiatric Interview or severe neurological or somatic disorders.                  | -                                                                                                                                                                                                  | DSM -IV    | Not mentioned |
| Zou (2020)       | 464 (233 / 231) | 92/141 /98 /133  | 35.65±9.77  | 36.96±7.82  | Case-control study | -                                                                                                                                                                                       | 1) All subjects were free of acute or chronic somatic disorders.<br>2) All patients were free of antidepressants or other psychotropic medications intake within 2 weeks before their examination. | DSM -IV    | PDSS          |
| Tanahashi (2021) | 955 (515/440)   | 148/367 /146/294 | 38.72±10.26 | 37.83±10.82 | Case-control study | 1) subjects who had lost consciousness due to major physical or neurological disorders or had alcohol abuse, substance abuse, or head trauma were excluded.                             | -                                                                                                                                                                                                  | DSM -IV    | Not mentioned |
