# Supplementary material for: Association between 5-HT1A receptor C-1019G, 5-HTTLPR polymorphisms and panic disorder: a meta-analysis
Source: publisher site journal article supplement (doi:10.18632/aging.206087), 2024-08-28
Supplement: Supplementary file [file aging-v16-206087-supplementary-material-SD1.pdf]

## SUPPLEMENTARY TABLES

**Supplementary Table 1. The characteristics of included studies explore the relationship between the 5-HT1A C-1019G polymorphism and PD.**

|                              | Sample size<br>(Case/control) | Sex<br>(male/female) | Age<br>(mean±SD)<br>(case/control) | Design                    | Exclusion<br>criteria                                                                                                                                                                                                                                                                                                                                                                                                                                                                                                                                             | Inclusion criteria                                                                                                                                                                                                                                                                                                                                                                                                                                                                                                                                                | Diagnosis<br>criteria                                                                      | measure to<br>assess<br>symptom<br>severity |
|------------------------------|-------------------------------|----------------------|------------------------------------|---------------------------|-------------------------------------------------------------------------------------------------------------------------------------------------------------------------------------------------------------------------------------------------------------------------------------------------------------------------------------------------------------------------------------------------------------------------------------------------------------------------------------------------------------------------------------------------------------------|-------------------------------------------------------------------------------------------------------------------------------------------------------------------------------------------------------------------------------------------------------------------------------------------------------------------------------------------------------------------------------------------------------------------------------------------------------------------------------------------------------------------------------------------------------------------|--------------------------------------------------------------------------------------------|---------------------------------------------|
| Huang<br>et al.<br>(2004)    | 194<br>(87/107)               | Not<br>mentioned     | Not mentioned<br>39.0±15.0         | Case-<br>control<br>study | Drug that may affect<br>5-HT1A Binding was<br>excluded.                                                                                                                                                                                                                                                                                                                                                                                                                                                                                                           | -                                                                                                                                                                                                                                                                                                                                                                                                                                                                                                                                                                 | DSM -IV                                                                                    | Not<br>mentioned                            |
| Rothe<br>et al.<br>(2004)    | 268<br>(134/134)              | 98/169               | 37.3±10.8<br>41.0±11.0             | Case-<br>control<br>study | -                                                                                                                                                                                                                                                                                                                                                                                                                                                                                                                                                                 | Patients with<br>predominant panic<br>disorder. The controls<br>were unrelated,<br>anonymous blood<br>donors.<br>1) >90% genotype<br>call rate;<br>2) minor allele<br>frequency<br>(MAF) >5%;<br>3) Hardy–Weinberg<br>equilibrium $p >$<br>0.001.<br>Three duplicates<br>were assessed in the<br>experiment and 100%<br>concordance in<br>genotypes was seen.                                                                                                                                                                                                     | DSM -IIIR /<br>DSM -IV                                                                     | Not<br>mentioned                            |
| Carolina<br>et al.<br>(2010) | 232<br>(107/125)              | 62/170               | 39.94±10.17                        | Case-<br>control<br>study | -                                                                                                                                                                                                                                                                                                                                                                                                                                                                                                                                                                 | 1) Panic disorder patients<br>who had comorbidity<br>with mood disorders or<br>other psychiatric<br>disorders were excluded.<br>2) The patients who had<br>a family history of<br>psychiatric disorders<br>were excluded except for<br>anxiety disorders.<br>The patients who had<br>medical diseases were<br>also excluded.<br>Exclusion criteria<br>included any history of<br>schizophrenia, bipolar<br>disorder, alcohol and<br>substance abuse or<br>dependence, mental<br>retardation, and current<br>or past serious medical<br>or neurological disorders. | the Mini<br>International<br>Neuropsychiatry<br>Interview (MINI)<br>– Brazilian<br>version | Not<br>mentioned                            |
| Choi et al.<br>(2010)        | 155<br>(94/111)               | 104/101              | 40.1±9.5,<br>38.3±7.3              | Case-<br>control<br>study | 1) Panic disorder patients<br>who had comorbidity<br>with mood disorders or<br>other psychiatric<br>disorders were excluded.<br>2) The patients who had<br>a family history of<br>psychiatric disorders<br>were excluded except for<br>anxiety disorders.<br>The patients who had<br>medical diseases were<br>also excluded.<br>Exclusion criteria<br>included any history of<br>schizophrenia, bipolar<br>disorder, alcohol and<br>substance abuse or<br>dependence, mental<br>retardation, and current<br>or past serious medical<br>or neurological disorders. | -                                                                                                                                                                                                                                                                                                                                                                                                                                                                                                                                                                 | DSM -IV                                                                                    | STAI,<br>PDSS, ASI,<br>API,<br>HAMA         |
| Choe<br>et al.<br>(2012)     | 366<br>(194/172)              | 133/181              | 18–75                              | Case-<br>control<br>study | 1) axis I diagnosis other<br>than PD; 2) axis II<br>diagnosis; 3) severe<br>physical illness or major<br>laboratory test<br>abnormalities; 4) suicide<br>risk; 5) history of<br>substance abuse                                                                                                                                                                                                                                                                                                                                                                   | -                                                                                                                                                                                                                                                                                                                                                                                                                                                                                                                                                                 | DSM -IV                                                                                    | ASI-R                                       |
| Takashi<br>et al.<br>(2017)  | 238<br>(119/119)              | 46/152               | 35.45±9.50<br>35.11±9.95           | Case-<br>control<br>study | Patients with<br>neurological diseases,<br>and/or past or current                                                                                                                                                                                                                                                                                                                                                                                                                                                                                                 | -                                                                                                                                                                                                                                                                                                                                                                                                                                                                                                                                                                 | DSM-IV-TR                                                                                  | Not<br>mentioned                            |
| Zou et al.<br>(2020)         | 464<br>(233/231)              | Not<br>mentioned     | 35.65 ± 9.77<br>36.96 ± 7.82       | Case-<br>control<br>study | Patients with<br>neurological diseases,<br>and/or past or current                                                                                                                                                                                                                                                                                                                                                                                                                                                                                                 | -                                                                                                                                                                                                                                                                                                                                                                                                                                                                                                                                                                 | DSM-IV                                                                                     | PDSS                                        |

episodes of MDD,  
generalized anxiety  
disorder (GAD), manic  
disorder, bipolar  
disorder, schizophrenia  
or any other psychiatric  
disorders were excluded.

---

**Supplementary Table 2. The characteristics of included studies explore the relationship between the 5-HTTLR polymorphism and PD.**

|                    | Sample size (case/control) | Sex (male/female)   | Age (mean±SD) (years) |             | Design             | Exclusion criteria                                                                                                                      | Inclusion criteria                                                                                                                                                                          | Diagnosis criteria | Measure to assess symptom severity |
|--------------------|----------------------------|---------------------|-----------------------|-------------|--------------------|-----------------------------------------------------------------------------------------------------------------------------------------|---------------------------------------------------------------------------------------------------------------------------------------------------------------------------------------------|--------------------|------------------------------------|
|                    |                            |                     | Case                  | Control     |                    |                                                                                                                                         |                                                                                                                                                                                             |                    |                                    |
| Deckert I (1997)   | 175 (85/90)                | Not mentioned       | Not mentioned         |             | Case-control study | -                                                                                                                                       | 1) Patients met the DSM-III-R criteria for panic disorder.<br>2) The controls who had unrelated                                                                                             | DSM - III-R        | Not mentioned                      |
| Deckert II (1997)  | 152 (73/79)                | Not mentioned       | Not mentioned         |             | Case-control study | -                                                                                                                                       | 1) Patients met the DSM-III-R criteria for panic disorder.<br>2) The controls who had unrelated                                                                                             | DSM - III-R        | Not mentioned                      |
| Ishiguro (1997)    | 216 (66/150)               | 30/33<br>70/80      | 27-79                 | 25-74       | Case-control study | -                                                                                                                                       | 1) Patients met the DSM-IV criteria for panic disorder.                                                                                                                                     | DSM - III-R        | Not mentioned                      |
| Matsushita (1997)  | 299 (86/213)               | 54/32<br>96/117     | 37.0 ± 12.1           | 37.7 ± 13.1 | Case-control study | -                                                                                                                                       | 1) Patients met the DSM-III-R criteria for panic disorder.<br>2) The controls who had unrelated                                                                                             | DSM - III-R        | Not mentioned                      |
| Ohara (1999)       | 133 (27/106)               | 11/16<br>47/59      | 38.7±10.5             | 35.6±11.6   | Case-control study | -                                                                                                                                       | 1) Patients met the DSM-IV criteria for panic disorder.<br>2) The controls had no history of psychiatric diseases or psychotropic medication in the past.                                   | DSM -IV            | Not mentioned                      |
| Samochowiec (2004) | 357 (191 /166)             | 54 /148             | 38.7±11.8             | 35.9±14.3   | Case-control study | 1) Subjects with a history of a primary major psychiatric disorder or substance dependence other than nicotine dependence were excluded | -                                                                                                                                                                                           | ICD-10             | Not mentioned                      |
| Barrondo (2005)    | 238 (119/119)              | 28/64<br>67/107     | 35.87±12.38           | 38.40 ±8.94 | Case-control study | -                                                                                                                                       | 1) Patients met the DSM-IV criteria for panic disorder.                                                                                                                                     | DSM -IV            | Not mentioned                      |
| Maron (2005)       | 373 (158/215)              | 32/ 126<br>56/159   | 38.0±12.9             | 39.8±13.0   | Case-control study | -                                                                                                                                       | 1) Patients met the DSM-IV criteria for panic disorder.<br>2) Only healthy subjects without personal or family history of psychiatric disorders among first-degree relatives were included. | DSM -IV            | Not mentioned                      |
| Olesen (2005)      | 212 (104/108)              | 28/76<br>30/78      | Not mentioned         |             | Case-control study | -                                                                                                                                       | 1) Patients met the DSM-IV criteria for panic disorder.<br>2) Patients were unrelated Scandinavians with a Caucasian genetic background.                                                    | DSM -IV            | Not mentioned                      |
| Kim (2006)         | 471 (244/227)              | 143/101<br>102 /125 | 36.1 ± 9.0            | 33.1 ± 9.1  | Case-control study | -                                                                                                                                       | 1) Patients met the DSM-IV criteria for panic disorder.<br>2) Patients with comorbid major depressive disorder were also included.                                                          | DSM -IV            | Not mentioned                      |

|                  |                 |                  |             |             |                    |                                                                                                                                                                                         |                                                                                                                                                                                                    |            |               |
|------------------|-----------------|------------------|-------------|-------------|--------------------|-----------------------------------------------------------------------------------------------------------------------------------------------------------------------------------------|----------------------------------------------------------------------------------------------------------------------------------------------------------------------------------------------------|------------|---------------|
| Choe (2013)      | 357 (191 /166)  | Not mentioned    | 18-75       |             | Case-control study | 1) any history of schizophrenia, bipolar disorder alcohol and substance abuse or dependence, mental retardation, and current or past serious medical or neurological disorders          | -                                                                                                                                                                                                  | DSM -IV    | Not mentioned |
| Watanabe (2017)  | 238 (119/119)   | 43/76 /43/76     | 35.45±9.50  | 35.11±9.95  | Case-control study | 1) axis I diagnosis other than PD;<br>2) axis II diagnosis;<br>3) severe physical illness or major laboratory test abnormalities;<br>4) suicide risk;<br>5) history of substance abuse. | -                                                                                                                                                                                                  | DSM -IV-TR | Not mentioned |
| Schiele (2019)   | 287 (109/536)   | 40/ 69 /153/383  | 36.2±10.9   | 25.2±5.6    | Case-control study | 1) past or present diagnosis of any DSM-IV axis I disorder as ascertained by the Mini International Psychiatric Interview or severe neurological or somatic disorders.                  | -                                                                                                                                                                                                  | DSM -IV    | Not mentioned |
| Zou (2020)       | 464 (233 / 231) | 92/141 /98 /133  | 35.65±9.77  | 36.96±7.82  | Case-control study | -                                                                                                                                                                                       | 1) All subjects were free of acute or chronic somatic disorders.<br>2) All patients were free of antidepressants or other psychotropic medications intake within 2 weeks before their examination. | DSM -IV    | PDSS          |
| Tanahashi (2021) | 955 (515/440)   | 148/367 /146/294 | 38.72±10.26 | 37.83±10.82 | Case-control study | 1) subjects who had lost consciousness due to major physical or neurological disorders or had alcohol abuse, substance abuse, or head trauma were excluded.                             | -                                                                                                                                                                                                  | DSM -IV    | Not mentioned |
